# Supplementary material for: Normalization of the α1-Na/K-ATPase/Src Signalosome Restored Microbiota Communities and Rescinded NASH Progression in the Mouse
Source: Preprints.org preprint supplement (doi:10.20944/preprints202109.0023.v2), 2022-05-25
Supplement: Supplementary file 1 [file supplementary]

## **SUPPLEMENTAL MATERIAL**

### **EXPANDED METHODS**

#### **Morphological assessment**

*Liver Fat Content Assessment.* The NAFLD activity score (NAS) was used on digitally recorded images at 40x magnification from the label but blinded liver slides stained with H&E.<sup>(1-5)</sup> Five pictures from each animal in each group were graded for individual criteria, and the aggregated scores were saved for data analyses. Criteria used for the NAS include macro-vesicular steatosis, micro-vesicular steatosis, inflammatory cell infiltrate, and cellular hypertrophy.

Steatosis was graded whether the fat vacuoles displace the nucleus (macro) or not (micro) as 0=<5%, 1=5-33%, 2=34-66%, and 3=>66%. Inflammatory foci were defined as an aggregate of more than 5 inflammatory cells as a cluster and it was scored as 0 (< 0.5 foci), 1 (0.5-1.0 foci), 2 (1.0-2.0 foci), and 3 (>2.0 foci). Hepatocellular hypertrophy was defined as cellular enlargement more than 1.5 times the normal hepatocyte diameter. The number of cells and their size were determined using ImageJ1.51u software (NIH, MD).

*Liver Collagen Deposition Assessment.* Masson's Trichrome staining was performed following a standardized protocol to assess fibrosis development.<sup>(6-8)</sup> Stained liver slides were graded for fibrosis using the following scale: 0: None; 1: Enlarged, fibrotic portal tracts; 2: peri-portal or portal-portal septa, but intact architecture; 3: Fibrosis with architectural distortion, but no evident cirrhosis; 4: probable or definitive cirrhosis with bridging fibrosis. Five pictures from each animal in each group were graded for individual criteria, and the aggregated scores were saved for data analyses. Digitally recorded images at X40 magnification from labeled but blinded liver slides were evaluated, and scores were recorded for data comparison.

*Liver Cell Senescence Activity Assessment.* The SA- $\beta$ -gal activity was detected using the Senescence Associated  $\beta$ -Galactosidase Staining kit (Cell signaling Technology #9860, MA) on fresh snap frozen on liquid nitrogen liver tissue embedded on OCT. Briefly, 6 $\mu$ m liver sections were fixed in kit fixative solution for 2min at room temperature, then washed in PBS twice. Slides were stained overnight in SA-  $\beta$ -gal staining solution at 37°C and pH5.5. In the morning, slides were rinsed with PBSx2, counter-stained with Nuclear Fast Red solution for 3-5min to have a final PBS wash. Sections were dehydrated using an increasing concentration of alcohol, cleared in xylene, and mounted with permount. Five pictures from each animal in each group were graded for individual criteria, and the aggregated scores were saved for data analyses. The percentage of cells with SA- $\beta$ -gal activity (blue-stained/over total counted cells) was evaluated on the same day. Digitally recorded images at X40 magnification from labeled but blinded liver slides were saved using ImageJ1.51u software.

*Liver Cell Apoptosis Activity Assessment.* Apoptosis activity was detected by the terminal deoxynucleotidyl transferase (TdT)-mediated dUTP nick end labeling (TUNEL) method on digital records from blinded liver slides (Click-iT Plus TUNEL assay kit, Invitrogen by Thermo Fisher Scientific, MA). Five pictures from each animal in each group were graded for individual criteria, and the aggregated scores were saved for data analyses. Images at x40 magnification were analyzed using ImageJ1.51u software, and data was generated by comparing the percentage of positive counted cells on DAPI/GFP superimposed images. A Faculty Pathologist supervised morphological assessment of all liver slides at Marshall University.

#### **Metabolomics: Plasma Treatment and Mass Spectrometry**

*Materials and reagents.* General chemicals, as well as glutathione (GSH) and glutathione disulfide (GS:SG) were from Sigma-Aldrich (St. Louis, MO). Homo-glutathione was from Chem-Impex International (Wood Dale, IL). Ophthalmic acid was from Bachem (Torrance, CA). Acetonitrile was procured from Fisher Scientific (Pittsburgh, PA). Octanoate was purchased

from Sigma (Milwaukee, WI).

**Plasma Treatment.** Heparinized blood, collected in glass tubes, was cooled by gentle repeated inversions in an ice water slurry for 1min and centrifuged (3,000g) at 4°C for 10min. To prevent its oxidation, GSH was immediately converted to a stable thioether by treating 100µl of blood with 100µl of 50mM iodoacetate in 10mM ammonium bicarbonate, pH=10, adjusted with concentrated ammonia hydroxide. After the buffy layer and the red blood cell pellet were removed, aliquots of plasma were treated with 50µl of iodoacetate buffer (vol:vol, 1:1), collected in pre-labeled microtubes and quick-frozen to be stored at -80°C until analysis.

**Liquid Chromatography-Mass Spectrometry (LC-MS) for Glutathione sp.** Reduced and oxidized glutathione (GSH and GSSG) and OA in plasma were analyzed using methods validated previously with minor modifications.<sup>(9-12)</sup> In brief, plasma samples were first treated with iodoacetate to derivatize GSH as GS-carboxymethyl, then GSSG in plasma were converted to GS-cyanomethyl using iodoacetonitrile after dithiothreitol reduction. The internal standard homoglutathione was spiked at the beginning of the process. OA determination was done separately by protein precipitation. All calibration curves consisted of two blanks and seven calibration points. The curve ranges were as follows: GSH, 0.78 – 200µM; GSSG, 0.157 – 40µM; ophthalmate, 0.156 – 20µM. A weighting factor of 1/x<sup>2</sup> was applied over the calibration curves. The resulting peak area ratios of analyte/internal standard were plotted against the concentrations. Electrospray-ionization mass spectrometry of thioethers was performed on a Thermo Scientific TSQ Quantum Ultra mass spectrometer (Thermo Fisher Scientific, Waltham, MA), equipped with a heated electrospray ion source (HESI-II), coupled to an Agilent 1200 HPLC. The chromatography was done with a reversed-phase C18 column (Synergi 4µ Hydro-RP, 50x2.0mm, Phenomenex). The compounds of interest were separated from mouse plasma endogenous components using 1% acetonitrile containing 0.1% formic acid at 0.1ml/min isocratic. The mass spectrometry was operated under positive ionization mode with the ion spray voltage at 4000V. The ion transfer tube temperature was maintained at 400°C, and the vaporizer temperature was 40°C. The gas setting for sheath, aux, and ion sweep were 50, 2, and 0 arb, respectively. Argon gas pressure was 1.5mTorr used as the collision gas in Q2. The collision energy was 15V for monitored transitions. Peak width for Q1 and Q3 was set at 0.7FWHM. Xcalibur software (version 2.1.0, Thermo) was used for data registration. The area under the curve of the spectra was recorded and captured on a database for concentration calculations and data analyses.

**Liquid Chromatography-Mass Spectrometry (LC-MS) for Non-Targeted Metabolon.** Solvent extraction from thaw samples was performed with MAA (methanol: acetonitrile: acetone; 1:1:1) and internal standards were reconstituted with methanol: H<sub>2</sub>O; 2:98. LC-MS analyses were performed on a 1290 Infinity Binary LC system from Agilent used for chromatographic separation in conjunction with a Waters Acquity UPLC HSS T3 1.8µm 2.1x100mm column in connection with a Water Acquity UPLC HSS T# 1.8µm pre-column. The column temperature was set up at 55°C at a flow rate of 0.45ml/min with time intervals for system equilibration (7min) and data acquisition (27min) for a total run time of 34min. Mobile phase-A was 0.1% formic acid in the water, and mobile phase-B was 0.1% formic acid in methanol. For elution, mobile phase-A and B were initially held at 98%:2% for 20min. Then, from 20.1min, the mobile phase was brought to 25%-A: 75%-B and held there for 2 min. Then, from 22.1min, the eluent was brought to 2%-A and held there until 30min. Finally, from 30.1 to 37min, the eluent was brought back for re-equilibration to 98%-A. Positive and Negative mass spectra curves were acquired in scan mode with a mass range of 50 to 1000m/z. Inline calibration was performed using debrisoquine sulfate (m/z 176.1182) and HP-0921 from Agilent (m/z 922.0098) in the positive mode, and 4-NBA (m/z 166.0146) and HP-0921 from Agilent (m/z 966.0007 formate adduct) in the negative mode. Mass spectrometer was set up as follows: gas temperature of the ion source at 325°C with drying gas flow at 10 l/ml; the nebulizer pressure was 45psi with a sheath gas at 400°C, a sheath flow of 12 l/ml and capillary voltage of 4000V, fragmentor voltage at 140V, and skimmer voltage at 65V. Raw

data were deconvoluted with the National Institute of Standards and Technology (NIST) Automated Mass Spectral Deconvolution and Identification Software (AMDIS). After spectral analysis and data processing of  $\approx 800$  signals, 94 signals could be identified in 89% of all samples. Identified signals were confirmed by our metabolomic library and the Fiehn library (Agilent Technologies Inc, Santa Clara, CA). For further quantification, the data was exported to the University of Michigan Core Metabolomic Server.

The concentration of each metabolite was expressed as its relative peak area (divided by the area of the corresponding internal standard in the same chromatogram). Some small compounds, although they were specifically targeted, were not found or identified with certainty in the present model. They included glycerol, pyruvate, and aceto-acetone. All 94 identified metabolites were included in the statistical analyses.

### **Statistical analyses of non-targeted metabolites.**

Statistical modeling was performed using a linear mixed-effect model of analysis of variance (mixed two-way ANOVA), fitted univariately to each variable (single metabolite concentration). For statistical inference, we used empirical Bayes methods and posterior estimators derived from them (moderated F-, t-, and B statistics) that have proven to result in higher statistical power and to be useful for ranking variables in terms of evidence for differential expression.<sup>(13-17)</sup> Information was borrowed by constraining the within-block correlations to be equal between variables and using empirical Bayes methods to moderate the standard deviations between them. These methods are particularly appropriate when only a few samples are available, as is always the case in high throughput datasets.<sup>(13, 18)</sup> Besides, the transformed  $\log^{10}$  data was interrogated by comparing the HFD group to the NMC group and the intervention groups (pNaK and exercise) to generated heat maps using the R software V5.1 (licensed to the University). Each metabolite from each animal in each group was compared at weeks 12, 16, 20 and 24.

### **Protein Expression and Activity**

*Western Blots (WB).* Protein gene expressions of FOXO1, and Src were evaluated by Western blots. 80 $\mu$ g of homogenized liver tissue were prepared to be loaded on nitrocellulose membranes, which were subsequently exposed to protein-specific monoclonal antibody (FOXO1 #2880S from Cell Signaling, pSrc #44-660G from Thermo Fisher Scientific, and c-Src sc-8056 from Santa Cruz Biotech) and developed according to protocols for the FluorChem M System (San Jose, CA). In addition, WB was used to detect the presence/absence of pNaK in liver tissue in treated/non-treated animal groups and to quantitate the expression of the  $\alpha 1$ -subunit of the Na/K-ATPase. Our laboratory developed a polyclonal rabbit antibody against pNaK. Polyclonal rabbit antibody against the  $\alpha 1$ -subunit was purchased from Millipore Sigma ([www.emdmillipore.com](http://www.emdmillipore.com)). The integrated density of the bands in the spectra was measured using ImageJ1.51u software, and spectra/data was saved on laboratory books and GraphPad Prism software, respectively (Loyola, CA, V7.04 licensed the University). For the Src expression, phosphorylated (pSrc) and complete (cSrc) varieties were run on liver samples, and integrated densities were measured. The ratio pSrc/ pSrc+cSrc was displayed.

*Real-Time Poly-Chain Reaction (RT-PCR).* The effect on lipid metabolism by diet  $\pm$  interventions was assessed by the expression of the Peroxisome Proliferator-Activated Receptors (PPARs) and its transcriptional coactivator PGC1 $\alpha$  using RT-PCR methods. Expression of glyceraldehyde-3-phosphate-dehydrogenase (GAPDH) was run as a housekeeping gene. Total RNA was extracted from flash-frozen liver tissue using RNeasy Protect Mini kit (QIAGEN, MD) according to the manufacturer's instructions. Total RNA (1 $\mu$ g) was transcribed into cDNA using SuperScript III (Invitrogen, CA) reverse transcription reagents. A quantitative real-time polymerase chain reaction analyzed total RNA. RT-PCR was performed using LightCycler 480 SYBR Green I Master (Roche Life Science) reagents on a Roche LightCycler 480 Instrument II (Roche Life Science, Indianapolis, IN). Specific primers for PPAR $\gamma$ , PGC1 $\alpha$ , and GAPDH were used (PPAR $\gamma$  forward TTGAAAGAAGCCAACACTAAACCAC, and PPAR $\gamma$  reverse AATGGCATCTCTGTGTC AACCAT; PGC1 $\alpha$  forward GGAGACGTGACCACTGACAATGA, and PGC1 $\alpha$  reverse TGTTGG

CTGGTGCCAGTAAGAG; GAPDH forward GCACCGTCAAGGCTGAGAAC, and GAPDH reverse TGGTGAAGACGCCAGTGGA). Each reaction was performed in triplicate, and all experimental samples were normalized using GAPDH as an internal control. The comparative threshold cycle (Ct) method was used to calculate the fold amplification as specified by the manufacturer. Total RNA was analyzed as well to assess the expression of the  $\alpha$ 1-subunit of the Na/K-ATPase.

**Na/K-ATPase Activity Assay.** The Na/K-ATPase activity was determined as previously described.<sup>(19)</sup> Briefly, 100mg of wet weight liver tissue was minced and homogenized in 2ml of buffer solution (0.25M sucrose, 1.25mM EGTA, and 10mM Tris-HCl, pH 7.0) in Glass-cold high-speed homogenizer at 2°C to yield a 1:2dilution; after filtration through a gauze, further dilutionsof the homogenates (1:4 and 1:8) was made by adding homogenizing buffer. Diluted samples were warmed to 37°C for 5mins followed by the mixing of diluted sample with reactive medium (vol:vol, 1:9) for a final concentrations of ATP (5.0mM), Mg<sup>++</sup> (5.0mM), Na<sup>+</sup> (120mM), K<sup>+</sup> (12.5mM), Tris (25.0mM), Cl<sup>-</sup> (137.5mM) and azide (5.0mM) at a pH=7.40 and constant T=37°C. The reaction was terminated by adding cold TCA at 5min of reaction time. The released inorganic phosphate (P<sub>i</sub>) was detected by the use of BioMol Green reagent (Enzo Life Sciences,NY) at room temperature. Samples, controls, and standard phosphate solutions were incubated with BioMol green for 25min in the dark, followed by optical density read at 620nm. For each run, a standard curve was generated to calculate the consumption of P<sub>i</sub> in  $\mu$ moles/mg protein/hr. The protein content was determined by the Lowry method, and estimates of Na/K-ATPase activity for a negative control parallel run (10mM of Ouabain added to sample) were performed.

## **References**

1. Abdel-Razik A, Mousa N, Shabana W, Refaey M, ElMahdy Y, Elhelaly R, et al. A novel model using mean platelet volume and neutrophil to lymphocyte ratio as a marker of nonalcoholic steatohepatitis in NAFLD patients: multicentric study. *Eur J Gastroenterol Hepatol*. 2016;28(1):e1-9.
2. Ballestri S, Nascimbeni F, Romagnoli D, Lonardo A. The independent predictors of non- alcoholic steatohepatitis and its individual histological features.: Insulin resistance, serum uric acid, metabolic syndrome, alanine aminotransferase and serum total cholesterol are a clue to pathogenesis and candidate targets for treatment. *Hepatol Res*. 2016;46(11):1074-87.
3. Cao Y, Pan Q, Cai W, Shen F, Chen GY, Xu LM, et al. Modulation of Gut Microbiota by Berberine Improves Steatohepatitis in High-Fat Diet-Fed BALB/C Mice. *Arch Iran Med*. 2016;19(3):197-203.
4. Hannah WN, Jr., Harrison SA. Lifestyle and Dietary Interventions in the Management of Nonalcoholic Fatty Liver Disease. *Dig Dis Sci*. 2016;61(5):1365-74.
5. Linden MA, Sheldon RD, Meers GM, Ortinau LC, Morris EM, Booth FW, et al. Aerobic exercise training in the treatment of non-alcoholic fatty liver disease related fibrosis. *J Physiol*. 2016;594(18):5271-84.
6. Bird B, Rowlette J. A protocol for rapid, label-free histochemical imaging of fibrotic liver. *Analyst*. 2017;142(8):1179-84.
7. Cheung JS, Fan SJ, Gao DS, Chow AM, Man K, Wu EX. Diffusion tensor imaging of liver fibrosis in an experimental model. *J Magn Reson Imaging*. 2010;32(5):1141-8.
8. Kimm SY, Tarin TV, Monette S, Srimathveeravalli G, Gerber D, Durack JC, et al. Nonthermal Ablation by Using Intravascular Oxygen Radical Generation with WST11: Dynamic Tissue Effects and Implications for Focal Therapy. *Radiology*. 2016;281(1):109-18.
9. Andres Ibarra R, Abbas R, Kombu RS, Zhang GF, Jacobs G, Lee Z, et al. Disturbances in the glutathione/ophthalmate redox buffer system in the woodchuck model of hepatitis virus- induced hepatocellular carcinoma. *HPB Surg*. 2011;2011:789323.
10. Ibarra R, Dazard JE, Sandlers Y, Rehman F, Abbas R, Kombu R, et al. Metabolomic Analysis of Liver Tissue from the VX2 Rabbit Model of Secondary Liver Tumors. *HPB Surg*. 2014;2014:310372.
11. Kombu RS, Zhang GF, Abbas R, Mieyal JJ, Anderson VE, Kelleher JK, et al. Dynamics of

glutathione and ophthalmate traced with 2H-enriched body water in rats and humans. *Am J Physiol Endocrinol Metab*. 2009;297(1):E260-9.

12. Sanabria JR, Kombu RS, Zhang GF, Sandlers Y, Ai J, Ibarra RA, et al. Glutathione species and metabolomic prints in subjects with liver disease as biological markers for the detection of hepatocellular carcinoma. *HPB (Oxford)*. 2016;18(12):979-90.
13. Dazard JE, Sunil Rao J. Joint adaptive meanvariance regularization and variance stabilization of high dimensional data. *Computational Statistics and Data Analysis*. 2012;56(7):2317-33.
14. Dazard JE, Xu H, Santana A. MVR R package: mean variance regularization. *ComprehensiveR Archive Network*. 2011.
15. Efron B. Robbins, empirical Bayes and microarrays. *The Annals of Statistics*. 2003;31(2):366-78.
16. Efron B, Tibschirani JD, Storey D, Tusher V. Empirical bayes analysis of a microarray experiment. *Journal of the American Statistical Association* 2001;96(456):1151-60.
17. Lonnstedt I, Rimini R, Nilsson P. Empirical bayes microarray ANOVA and grouping cell lines by equal expression levels. *Statistical Application in Genetics and Molecular Biology* 2005;4(7).
18. Newton MA, Noueiry A, Sarkar D, Alhquist P. Detecting differential gene expression with a semiparametric hierarchical mixture method. *Biostatistics*. 2004;5(2):155-76.
19. Ismail-Beigi F, Edelman IS. The mechanism of the calorigenic action of thyroid hormone. Stimulation of Na<sup>+</sup> + K<sup>+</sup>-activated adenosinetriphosphatase activity. *J Gen Physiol*. 1971;57(6):710-22.

## Supplemental Material

### Table 1

List of amino-acids, carbohydrates, and lipids from plasma of rodents exposed to normal mouse chow (NMC) or high fat diet (HFD). Animals with established NASH were provided with no intervention or an intervention, pNaKtide or exercise protocol.

| METABOLITE NAME               | Kind    | Experimental Groups |                  |          |                  |                  |                  |          |
|-------------------------------|---------|---------------------|------------------|----------|------------------|------------------|------------------|----------|
|                               |         | NMC                 | HFD              |          | HFD              | pNaKtide         | Exercise         |          |
|                               |         | 24Week              | 24Week           | P-value* | 24Week           | 24Week           | 24Week           | P-value* |
| 3-UREIDOPROPIONIC ACID        | Peptide | 13633±4566          | 15533±10936      | NS       | 15533±10936      | 36844±15500      | 25387±6649       | <0.05    |
| 4-COUMARIC ACID               | Peptide | 31824±19126         | 13121±6363       | <0.05    | 13121±6363       | 10785±9725       | 12726±5232       | NS       |
| 4-HYDROXYBENZOIC ACID         | Peptide | 9132±1185           | 5225±ND          | *NP      | 5225±ND          | ND               | 8483±ND          | NP       |
| 2-OXOPENTANOIC ACIDS          | Peptide | 1713633±334229      | 1278205±320809   | <0.05    | 1278205±320809   | 1283838±347822   | 1541819±389056   | NS       |
| GLUTAMINE                     | Peptide | 22951±9624          | 20569±9510       | NS       | 20569±9510       | 28264±1254       | 31441±7436       | NS       |
| <b>GLUTATHIONE (OXIDIZED)</b> | Peptide | 21631±9770          | 58391±28237      | <0.05    | 58391±28237      | 32876±7608       | 24511±6561       | <0.05    |
| HIPPURIC ACID                 | Peptide | 22131742±1988863    | 22456867±2210184 | NS       | 22456867±2210184 | 16549282±9429530 | 18779494±2949507 | NS       |
| ISOLEUCINE                    | Peptide | 212672±45422        | 186668±24327     | NS       | 186668±24327     | 199393±71768     | 228445±86743     | NS       |
| KYNURENIC ACID                | Peptide | 15956±5823          | 9186±4342        | NS       | 9186±4342        | 7900±1479        | 7803±1002        | NS       |
| L-HISTIDINE                   | Peptide | 8280±3336           | 7551±3216        | NS       | 7551±3216        | 10549±2406       | 15440±5078       | NS       |
| L-TRYPTOPHAN                  | Peptide | 526582±58182        | 511388±52165     | NS       | 511388±52165     | 455774±98196     | 470123±181366    | NS       |
| <b>LYSINE</b>                 | Peptide | 8474±2194           | 10975±922        | <0.05    | 10975±922        | 14163±1867       | 19853±4068       | <0.05    |
| N-ACETYLGLYCINE               | Peptide | 19086±16253         | 6539±ND          | NP       | 6539±ND          | 11632±ND         | 9306±ND          | NP       |
| N-ACETYL-L-ALANINE            | Peptide | 2428±ND             | 20516±10736      | NP       | 20516±10736      | 29284±ND         | 21585±10641      | NP       |
| N-ACETYL-L-LEUCINE            | Peptide | 130301±44499        | 105017±29922     | <0.05    | 105017±29922     | 119675±79799     | 109605±39073     | NS       |
| N-ACETYL-L-PHENYLALANINE      | Peptide | 61046±11829         | 38194±6372       | <0.05    | 38194±6372       | 30019±14979      | 39666±16066      | NS       |
| PHENYLALANINE                 | Peptide | 341328±50115        | 364373±46304     | NS       | 364373±46304     | 361671±92631     | 347017±73207     | NS       |
| PIMELIC ACID                  | Peptide | 7642±1255           | 8244±360         | NS       | 8244±360         | 11154±3274       | 7105±ND          | NP       |
| THYMIDINE                     | Peptide | 147065±30243        | 136643±23843     | NS       | 136643±23843     | 157329±28806     | 125731±22723     | NS       |
| THYMINE                       | Peptide | 263379±10027        | 245320±22888     | NS       | 245320±22888     | 242683±47507     | 237349±53987     | NS       |
| TYROSINE                      | Peptide | 223150±20045        | 184140±63255     | NS       | 184140±63255     | 215290±111067    | 302818±70368     | <0.05    |
| URIC ACID                     | Peptide | 226627±245663       | 597501±781901    | NS       | 597501±781901    | 346352±446629    | 391535±464285    | NS       |
| URIDINE                       | Peptide | 172167±85947        | 398329±251138    | <0.05    | 398329±251138    | 347011±174990    | 239531±95502     | NS       |
| <b>ZEATIN</b>                 | Peptide | 167655±24268        | 150091±10944     | <0.05    | 150091±10944     | 135863±29654     | 135411±18393     | <0.05    |

\*If n<5 for a metabolite in a group, the statistical analysis was not performed (NP).

| METABOLITE NAME           | Experimental Groups |                |                |              |                |                 |                 |              |
|---------------------------|---------------------|----------------|----------------|--------------|----------------|-----------------|-----------------|--------------|
|                           | Kind                | NMC            | HFD            |              | HFD            | pNaKtide        | Exercise        |              |
|                           |                     | 24Week         | 24Week         | P-<br>value* | 24Week         | 24Week          | 24Week          | P-<br>value* |
| BUTYRIC ACID              | Carbohydrate        | 136900±13436   | 238877±40419   | <0.05        | 238877±40419   | 342006±144902   | 400409±127502   | <0.05        |
| BENZOIC ACID              | Carbohydrate        | 52510±18477    | 96710±6365     | <0.05        | 96710±6365     | 58182±28555     | 70640±17209     | <0.05        |
| CITRAMALIC ACID           | Carbohydrate        | 1700753±578074 | 1864369±856907 | NS           | 1864369±856907 | 2465687±1100861 | 2742937±1038740 | <0.05        |
| CITRIC ACID               | Carbohydrate        | 2708109±201367 | 3746763±46031  | <0.05        | 3746763±46031  | 3282571±877303  | 2893585±359716  | <0.05        |
| DEOXYURIDINE              | Carbohydrate        | 159485±28692   | 113325±57977   | NS           | 113325±57977   | 118369±63345    | 110416±54091    | NS           |
| D-GLUCOSAMINE 6-SULFATE   | Carbohydrate        | 18374±8325     | 17577±1312     | *NP          | 17577±1312     | 9953±32         | 5867±3090       | NP           |
| GLUCOSE                   | Carbohydrate        | 210782±227566  | 345560±150718  | <0.05        | 345560±150718  | 180332±210096   | 187387±173998   | <0.05        |
| GLUTARIC ACID             | Carbohydrate        | 55036±20932    | 150603±61610   | <0.05        | 150603±61610   | 219213±213481   | 198069±129484   | NS           |
| HOMOVANILLIC ACID         | carbohydrate        | 13689±1028     | 10045±3139     | <0.05        | 10045±3139     | 7951±1041       | 7179±939        | <0.05        |
| INDOLE-3-PYRUVIC ACID     | carbohydrate        | 5357±3622      | 4785±2582      | NS           | 4785±2582      | 14389±7618      | 12504±11303     | <0.05        |
| INOSINE’s                 | Carbohydrate        | 104312±26218   | 163697±66970   | <0.05        | 163697±66970   | 161328±43310    | 131891±46443    | NS           |
| ISOCITRIC ACID            | carbohydrate        | 3562142±250803 | 4110980±995231 | <0.05        | 4110980±995231 | 4003415±820203  | 3761590±403912  | NS           |
| LACTIC ACID               | carbohydrate        | 233017±53067   | 269941±120642  | NS           | 269941±120642  | 224862±85464    | 281236±73993    | NS           |
| MALEIC ACID               | carbohydrate        | 42927±15026    | 73767±24525    | <0.05        | 73767±24525    | 79419±57489     | 81615±32297     | NS           |
| MALIC ACID                | carbohydrate        | 46118±11016    | 57993±16328    | <0.05        | 57993±16328    | 112550±121282   | 98393±49210     | <0.05        |
| METHYL BETA-D-GALACTOSIDE | carbohydrate        | 139948±15875   | 15084±9067     | <0.05        | 15084±9067     | 21798±6509      | 10411±2838      | <0.05        |
| METHYLMALONIC ACID        | carbohydrate        | 18467±6095     | 21842±1848     | NS           | 21842±1848     | 20232±4480      | 18512±3916      | NS           |
| OXALOACETIC ACID          | carbohydrate        | 412772±48365   | 388334±39291   | NS           | 388334±39291   | 399300±75048    | 387790±30313    | NS           |
| PHTHALIC ACID             | carbohydrate        | 22434±0        | 11568±2642     | NP           | 11568±2642     | 11294±1624      | 8818±0          | NP           |
| SUCCINIC ACID             | carbohydrate        | 209834±153853  | 551798±356372  | <0.05        | 551798±356372  | 644551±876855   | 279416±130807   | NS           |
| THYMIDINE                 | carbohydrate        | 147065±30243   | 136643±23843   | NS           | 136643±23843   | 136260±48226    | 125731±22723    | NS           |
| TRANS-ACONITIC ACID       | carbohydrate        | 234201±210269  | 313096±221031  | NS           | 313096±221031  | 302900±193617   | 238550±114493   | NS           |
| XANTHINE                  | carbohydrate        | 32567±0        | 63862±58166    | NP           | 63862±58166    | 63862±58166     | 152911±113380   | NS           |
| XANTHOSINE                | carbohydrate        | 15451±0        | 23618±13508    | NP           | 23618±13508    | 64524±0         | 0±0             | NP           |

\*If n<5 for a metabolite in a group, the statistical analysis was not performed (NP).

| METABOLITE NAME         | Kind  | Experimental Groups |               |          |               |               |              | p-value* |
|-------------------------|-------|---------------------|---------------|----------|---------------|---------------|--------------|----------|
|                         |       | NMC                 | HFD           | p-value* | HFD           | pNaKtide      | Exercise     |          |
|                         |       | 24Week              | 24Week        |          | 24Week        | 24Week        | 24Week       |          |
| ADIPIC ACID             | Lipid | 9023±2135           | 14024±5700    | <0.05    | 14024±5700    | 17227±4781    | 13639±5015   | NS       |
| ARACHIDIC ACID          | Lipid | 17808±7593          | 16941±10347   | NS       | 16941±10347   | 18081±12009   | 18229±9083   | NS       |
| <b>ARACHIDONIC ACID</b> | Lipid | 56224±20232         | 187550±89136  | <0.05    | 187550±89136  | 96568±63643   | 88434±46903  | <0.05    |
| BEHENIC ACID            | Lipid | 17921±2014          | 14981±3108    | NS       | 14981±3108    | 18276±7055    | 16349±3991   | NS       |
| CAPRYLIC ACID           | Lipid | 8235±0              | 14695±5273    | NP       | 14695±5273    | 51796±23068   | 87502±50693  | <0.05    |
| CIS-11-EICOSENOIC ACID  | Lipid | 6653±1896           | 7079±2194     | NS       | 7079±2194     | 16156±12193   | 7895±1027    | NS       |
| <b>CORTICOSTERONE</b>   | Lipid | 51373±5709          | 85029±11330   | <0.05    | 85029±11330   | 77224±20347   | 57310±18100  | <0.05    |
| DOCOSAHEXAENOIC ACID    | Lipid | 140460±91921        | 125748±111514 | NS       | 125748±111514 | 55801±60722   | 47702±31259  | NS       |
| EPIBRASSINOLIDE         | Lipid | 430639±36260        | 392399±39397  | NS       | 392399±39397  | 379010±53178  | 378321±74660 | NS       |
| ERUCIC ACID             | Lipid | 6393±3349           | 7132±3663     | NS       | 7132±3663     | 6543±4767     | 6600±3463    | NS       |
| HEPTADECANOIC ACID      | Lipid | 3545±722            | 4146±1220     | NS       | 4146±1220     | 7261±2387     | 4673±976     | <0.05    |
| LIGNOCERIC ACID         | Lipid | 2016±669            | 1951±750      | NS       | 1951±750      | 3226±876      | 2165±723     | <0.05    |
| LINOLEIC ACID           | Lipid | 102817±66692        | 114235±34869  | NS       | 114235±34869  | 166039±49043  | 92415±36615  | <0.05    |
| MYRISTIC ACID           | Lipid | 4038±1518           | 3553±995      | NS       | 3553±995      | 5750±3056     | 3231±1067    | NS       |
| MYRISTOLEIC ACID        | Lipid | 8435±4072           | 10032±2060    | NS       | 10032±2060    | 12153±6768    | 7023±2555    | NS       |
| NERVONIC ACID           | Lipid | 1959±482            | 1798±334      | NS       | 1798±334      | 2468±1169     | 1362±419     | <0.05    |
| OLEIC ACID              | Lipid | 177669±100039       | 236903±51510  | NS       | 236903±51510  | 380254±138107 | 215827±33938 | <0.05    |
| PALMITIC ACID           | Lipid | 56987±32515         | 63557±8874    | NS       | 63557±8874    | 130281±83954  | 68882±19078  | <0.05    |
| PALMITOLEIC ACID        | Lipid | 20565±16069         | 27060±7841    | NS       | 27060±7841    | 39032±10464   | 24501±10357  | <0.05    |
| SEBACIC ACID            | Lipid | 28480±8595          | 75404±0       | NP       | 0±0           | 4752±0        | 4618±0       | N.P.     |
| STEARIC ACID            | Lipid | 57709±20613         | 75404±15206   | NS       | 75404±15206   | 122990±68209  | 83680±24176  | NS       |

\*If n<5 for a metabolite in a group, the statistical analysis was not performed (NP).
